# Supplementary material for: IL-27 induces IFN/STAT1-dependent genes and enhances function of TIGIT+ HIVGag-specific T cells
Source: PubMed Central journal article supplement — iScience. 2021 Dec 9;25(1):103588. doi: 10.1016/j.isci.2021.103588 (PMC8717455; doi:10.1016/j.isci.2021.103588), 2021-12-09
Supplement: mmc1.pdf [file mmc1.pdf]

**iScience, Volume 25**

**Supplemental information**

**IL-27 induces IFN/STAT1-dependent  
genes and enhances function  
of TIGIT<sup>+</sup> HIVGag-specific T cells**

**Jie Cheng, Timothy G. Myers, Callie Levinger, Princy Kumar, Jai Kumar, Bruktawit A. Goshu, Alberto Bosque, and Marta Catalfamo**

## Supplementary Materials

**Figure S1. T cell expression of IL-27R $\alpha$  and gp130 in PLWH and healthy controls. Related to Figure 1.** PBMCs from PLWH (HIV<sup>+</sup>, frozen n= 10, fresh n= 5) and healthy controls (HC, frozen n= 10) were rested overnight and stained with IL-27R $\alpha$  and gp130 mAbs (Table S2 Panel 1). Representative histogram and expression levels of: **(A)** IL-27R $\alpha$ /WSX-1 and **(B)** gp130 in CD4 and CD8 T cells. The graphs represent expression levels of IL-27R $\alpha$  and gp130 (median fluorescence intensity, MFI) in CD4 and CD8 T cells from PLWH and HC. Graphs represent the box and whisker showing the median value with first and third quartiles in the box, with whiskers extending to the minimum and maximum values. **(C)** Left panel: representative histogram of phosphorylation of STAT1 by increasing concentration of rhIL-27 (5, 10, 25 and 100 ng/ml). Right Panel: PBMC from healthy control (n= 3) were pre-incubated with increasing concentrations of anti-IL-27R $\alpha$  mAb (5, 10, and 20  $\mu$ g/ml) for 20 minutes on ice followed by stimulation with rhIL-27 at 5, 10, 25 and 100 ng/ml for 30 minutes. Phosphorylation of STAT1 was measured by flow cytometry, graph represents median and interquartile range of the frequency of p-STAT1 positive T cells. **(D)** PBMCs from PLWH (HIV<sup>+</sup>, n=10) were rested overnight and incubated with anti-IL-27R $\alpha$  (10  $\mu$ g/mL), anti-gp130 (10  $\mu$ g/ml), alone or in combination. IgG (10  $\mu$ g/mL) was used as control. Cells were stimulated with 10 ng/ml of rhIL-27 for 30 minutes and p-STAT1 and p-STAT3 was measured by flow cytometry. **(E)** Cells were stimulated with 10 ng/mL of IL-6 for 30 minutes and STAT1 and STAT3 phosphorylation was measured by flow cytometry. The graphs are represented by box and whisker showing the median value with first and third quartiles in the box, with whiskers extending to the minimum and maximum values. Comparisons between the culture conditions were performed by Wilcoxon test. *P* value < 0.05 was considered significant.

**Figure S2. DEGs in T cell subsets upon *in vitro* stimulation IL-27. Related to Figure 2.**

RNAseq analysis was performed in sorted naïve (CD45RA<sup>+</sup>CD27<sup>+</sup>) and memory (CD45RA<sup>-</sup>CD27<sup>+</sup>) T cells from PLWH (HIV<sup>+</sup>, n= 5) and healthy controls (HC, n= 3) stimulated *in vitro* with 100 ng/ml of rhIL-27 for 90 minutes. Bar graphs represent Differentially Expressed Genes (DEGs) upregulated (red bars) and downregulated (blue bars) in T cell subsets. The DEGs induced by IL-27 stimulation used were selected based on expression change > 2 -fold ( $|\text{Log}_2 \text{FC}| > 1$ ) compared with unstimulated condition and FDR < 0.05.

**Figure S3. *TBX21* is upregulated by IL-27 stimulation. Related to Figure 3.**

RNAseq analysis was performed in sorted naïve (CD45RA<sup>+</sup>CD27<sup>+</sup>) and memory (CD45RA<sup>-</sup>CD27<sup>+</sup>) T cells from PLWH (HIV<sup>+</sup>, n= 5) and healthy controls (HC, n= 3) stimulated *in vitro* with 100 ng/ml of rhIL-27 for 90 minutes. **(A)** Expression of Th1, Th2, Th17 and Treg core genes in T cell subsets with IL-27 stimulation is represented by heatmap. **(B)** Expression of immune checkpoint receptors in T cell subsets with IL-27 stimulation is represented by heatmap. Gene expression ( $\log_2$  of stimulated /unstimulated ratio) level is indicated by different color. **(C)** PBMCs from healthy control (HC, n= 1) were cultured with rhIL-27 at concentrations: 0.5ng/ml, 5 ng/ml, 25 ng/ml and 100 ng/ml for 6 hours or overnight. Flow cytometry analysis was performed for expression of CD69 in T cells. Line with round symbol for overnight culture and line with triangle symbol for 6 hours culture. **(D)** PBMCs from PLWH (HIV<sup>+</sup>, n= 17) were cultured in the absence (opened symbols) or presence (closed symbols) of rhIL-27 (100 ng/ml) overnight. Flow cytometry analysis was performed for expression of Granzyme A and Granzyme B in CD4 and CD8 T cells. Expression of GZA<sup>+</sup>GZB<sup>+</sup> is represented as frequencies of CD4 and CD8 T cells. The graph is represented by box and whisker showing the median value with first

and third quartiles in the box, with whiskers extending to the minimum and maximum values. Comparisons between culture conditions were performed using non-parametric Wilcoxon test.  $P$  value  $< 0.05$  was considered significant.

**Figure S4. IL-27 promoted cytokine secretion in TIGIT<sup>-</sup> T cells from HIV infected donors.**

**Related to Figure 4.** PBMCs from PLWH (HIV<sup>+</sup>, n=17) were cultured in the absence (red opened symbols) or presence (red closed symbols) of rhIL-27 (100 ng/ml) overnight follow by stimulation with HIV<sub>Gag</sub> peptide pool. DMSO was used as control. PBMCs from and healthy controls (HC, n= 17) were cultured in the absence (black opened symbols) or presence (black closed symbols) of rhIL-27 (100 ng/ml) overnight and stimulated with CEF. DMSO was used as control. Secretion of cytokines by TIGIT<sup>-</sup> T cells was analyzed by flow cytometry. **(A)** Gating strategy for TIGIT<sup>-</sup> CD4 and CD8 T cells. TIGIT<sup>-</sup> CD4 and CD8 T cells were analyzed for expression of: **(B)** CD69<sup>+</sup>CD107a<sup>+</sup>; **(C)** CD69<sup>+</sup>IFN $\gamma$ <sup>+</sup>; and **(D)** CD69<sup>+</sup>TNF $\alpha$ <sup>+</sup>. The graphs are represented by box and whisker showing the median value with first and third quartiles in the box, with whiskers extending to the minimum and maximum values of the frequencies of T cells secreting cytokines. Comparisons between the culture conditions were performed by Wilcoxon test. Comparisons between PLWH and healthy controls were performed by Mann-Whitney test.  $P$  value  $< 0.05$  was considered significant.

**Figure S5. Detection of p24 in the supernatants of PBMCs from PLWH. Related to Figure 4 and 5.** PBMCs from PLWH (n= 4) were cultured in presence or absence of IL-27 100 ng/ml at a cell concentration of 2 to 3x10<sup>6</sup> cells/ml. Supernatants were harvested after overnight and 3 days of culture. PBMCs (n= 4) stimulated with media and CD3/CD28 (TransAct beads) during 4

days were used as controls. P24 was measured in the supernatants by ultrasensitive ELISA (as described by Levinger et al. DOI: 10.21203/rs.3.rs-832339/v1). The graph is represented by box and whisker showing the median value with first and third quartiles in the box, with whiskers extending to the minimum and maximum values. Each color represents one individual donors and viral load and CD4 counts are indicated. The dashed line in the graphs represents the LOD (limit of detection) of p24. Overnight and 3 day is 3.02 fg/mL and 4 day culture LOD for is 7.17 fg/mL.

**Table S1. Patients Characteristics. Related to STAR Methods.**

| <b>Cohorts</b>                                         | <b>Cohorts used in the experiments</b>        |                                        |                        |                                 |
|--------------------------------------------------------|-----------------------------------------------|----------------------------------------|------------------------|---------------------------------|
|                                                        | <b>IL-27 Receptor Expression and Blockade</b> | <b>STATs Expression and Activation</b> | <b>RNAseq Analysis</b> | <b>Cytokine Secretion Assay</b> |
| <b>Gender</b>                                          | F (3), M (12)                                 | F (2), M (10)                          | F (1), M (4)           | F (2), M (15)                   |
| <b>Age (median, IQR)</b>                               | 56 (47-58)                                    | 52.5 (43.25-58)                        | 60 (48.5-62)           | 55 (45-60.75)                   |
| <b>CD4 count cells/<math>\mu</math>l (median, IQR)</b> | 834 (543-1083)                                | 321 (236.3-685.3)                      | 921 (559-1103)         | 560 (487-757)                   |
| <b>CD8 count cells/<math>\mu</math>l (median, IQR)</b> | Not reported                                  | 850 (437.5-1258)                       | Not reported           | 867 (574.5-1333)                |
| <b>Viral Load copies/ml (median, IQR)</b>              | 20 (20-20)                                    | 50 (20-50)                             | 20 (20-20)             | 20 (20-20)                      |

\*F: female; M: male, IQR indicated 25-75% range

**Table S2. Antibodies used in Flow Cytometry Experiments. Related to STAR Methods.**

| <b>Antibody</b> | <b>Fluorochrome</b> | <b>Clone</b> | <b>Catalog No.</b> | <b>Company</b> |
|-----------------|---------------------|--------------|--------------------|----------------|
| <b>Panel 1</b>  |                     |              |                    |                |
| CD3             | BV711               | UCHT1        | 563725             | BD Biosciences |
| CD8             | BUV395              | RPA-T8       | 563795             | BD Biosciences |
| CD4             | BUV805              | SK3          | 612887             | BD Biosciences |
| IL-27R $\alpha$ | PE                  | 191106       | FAB14791P          | R&D Systems    |
| gp130           | PE-Cy7              | 2E1B02       | 362008             | Biolegend      |
| <b>Panel 2</b>  |                     |              |                    |                |
| CD3             | BV711               | UCHT1        | 563725             | BD Biosciences |
| CD4             | BUV805              | SK3          | 612887             | BD Biosciences |
| (pY701) STAT1   | PE                  | 4a           | 612564             | BD Biosciences |
| <b>Panel 3</b>  |                     |              |                    |                |
| CD3             | BV711               | UCHT1        | 563725             | BD Biosciences |
| CD4             | BUV805              | SK3          | 612887             | BD Biosciences |
| CD45RA          | BV510               | HI100        | 304141             | Biolegend      |
| CD27            | BUV737              | L128         | 612829             | BD Biosciences |
| STAT1           | A647                | 1/STAT1      | 558560             | BD Biosciences |
| STAT3           | PerCP-Cy5.5         | M59-50       | 564133             | BD Biosciences |
| (pY701) STAT1   | PE                  | 4a           | 612564             | BD Biosciences |
| (pY705) STAT3   | A488                | D3A7         | 4323S              | Cell Signaling |
| <b>Panel 4</b>  |                     |              |                    |                |
| CD3             | FITC                | OKT3         | 317306             | Biolegend      |
| CD4             | PE                  | L200         | 550630             | BD Biosciences |
| CD8             | APC                 | RPA-T8       | 555369             | BD Biosciences |
| CD27            | APC-H7              | M-T271       | 560222             | BD Biosciences |
| CD45RA          | BV605               | HI100        | 562886             | BD Biosciences |
| <b>Panel 5</b>  |                     |              |                    |                |
| CD3             | BV650               | SP34-2       | 563916             | BD Biosciences |
| CD4             | BUV805              | SK3          | 612887             | BD Biosciences |
| CD8             | BUV395              | RPA-T8       | 563795             | BD Biosciences |
| CD25            | BV711               | M-A251       | 356138             | Biolegend      |
| CD69            | BV785               | FN50         | 563834             | BD Biosciences |
| LAG-3 (CD223)   | PE-Dazzle 594       | 11C3C65      | 369332             | Biolegend      |
| TIGIT           | PE-Cy7              | A15153G      | 372714             | Biolegend      |
| TIM-3           | APC-Cy7             | F38-2E2      | 345026             | Biolegend      |
| CD107a          | PE-Cy5              | H4A3         | 555802             | BD Biosciences |
| IFN $\gamma$    | V570                | 4S.B3        | 502534             | Biolegend      |
| TNF $\alpha$    | A488                | MAb11        | 557722             | BD Biosciences |
| Granzyme A      | AF700               | CB9          | 507210             | Biolegend      |
| Granzyme B      | V510                | GB11         | 563388             | BD Biosciences |
| FOXP3           | PE                  | 259D         | 320208             | Biolegend      |
| T-bet           | V450                | 4B10         | 644816             | Biolegend      |
| GATA3           | A647                | 16E10A23     | 653810             | Biolegend      |



**Table S3. Top 10 canonical pathway analysis in T cells subsets upon IL-27 stimulation. Related to Figure 2.**

| Naïve CD4 T cells                                                            |                |        |         |                                                                              |                |        |         |
|------------------------------------------------------------------------------|----------------|--------|---------|------------------------------------------------------------------------------|----------------|--------|---------|
| HC                                                                           |                |        |         | HIV <sup>+</sup>                                                             |                |        |         |
| Canonical pathway                                                            | -log (p-value) | Ratio  | Z-score | Canonical pathway                                                            | -log (p-value) | Ratio  | Z-score |
| Interferon Signaling                                                         | 10.5           | 0.25   | 2.121   | Interferon Signaling                                                         | 14.1           | 0.361  | 2.887   |
| Role of Hypercytokinemia/hyperchemokinaemia in the Pathogenesis of Influenza | 9.4            | 0.128  | 3.317   | Systemic Lupus Erythematosus in B Cell Signaling Pathway                     | 12.2           | 0.0949 | 4.315   |
| Prolactin Signaling                                                          | 7.02           | 0.105  | 0.707   | Role of Hypercytokinemia/hyperchemokinaemia in the Pathogenesis of Influenza | 11.1           | 0.174  | 3.873   |
| Systemic Lupus Erythematosus in B Cell Signaling Pathway                     | 6.58           | 0.0511 | 3.207   | Prolactin Signaling                                                          | 7.82           | 0.14   | 1.897   |
| Coronavirus Pathogenesis Pathway                                             | 5.58           | 0.0547 | -2.714  | JAK/Stat Signaling                                                           | 7.04           | 0.134  | 1.508   |
| JAK/Stat Signaling                                                           | 4.98           | 0.0854 | -0.378  | Role of Pattern Recognition Receptors in Recognition of Bacteria and Viruses | 6.58           | 0.0903 | 2.646   |
| STAT3 Pathway                                                                | 4.45           | 0.0593 | -0.378  | Th1 Pathway                                                                  | 6.2            | 0.1    | 0.905   |
| MSP-RON Signaling in Macrophages Pathway                                     | 4.05           | 0.0614 | 1.134   | Activation of IRF by Cytosolic Pattern Recognition Receptors                 | 5.98           | 0.138  | 1.667   |
| Necroptosis Signaling Pathway                                                | 4.02           | 0.0516 | 2.121   | Coronavirus Pathogenesis Pathway                                             | 5.94           | 0.0746 | -1.604  |
| Tumor Microenvironment Pathway                                               | 3.59           | 0.0447 | 2.121   | Tumor Microenvironment Pathway                                               | 5.82           | 0.0782 | 2.673   |
| Memory CD4 T cells                                                           |                |        |         |                                                                              |                |        |         |
| HC                                                                           |                |        |         | HIV <sup>+</sup>                                                             |                |        |         |
| Canonical pathway                                                            | -log (p-value) | Ratio  | Z-score | Canonical pathway                                                            | -log (p-value) | Ratio  | Z-score |
| Interferon Signaling                                                         | 15.8           | 0.361  | 2.887   | Interferon Signaling                                                         | 18.3           | 0.417  | 3.207   |
| Role of Hypercytokinemia/hyperchemokinaemia in the Pathogenesis of Influenza | 11.7           | 0.163  | 3.742   | Role of Hypercytokinemia/hyperchemokinaemia in the Pathogenesis of Influenza | 13.2           | 0.186  | 4       |
| Systemic Lupus Erythematosus in B Cell Signaling Pathway                     | 7.39           | 0.062  | 3.153   | Systemic Lupus Erythematosus in B Cell Signaling Pathway                     | 9.48           | 0.0766 | 4.583   |
| Role of Pattern Recognition Receptors in Recognition of Bacteria and Viruses | 6.4            | 0.0774 | 2.646   | Th1 Pathway                                                                  | 6.91           | 0.1    | 0.333   |
| Activation of IRF by Cytosolic Pattern Recognition Receptors                 | 5.96           | 0.123  | 2.121   | Prolactin Signaling                                                          | 6.47           | 0.116  | 0.333   |
| Prolactin Signaling                                                          | 5.04           | 0.093  | 0.378   | Role of Pattern Recognition Receptors in Recognition of Bacteria and Viruses | 5.71           | 0.0774 | 2.449   |
| Coronavirus Pathogenesis Pathway                                             | 4.47           | 0.0547 | -3.317  | Activation of IRF by Cytosolic Pattern Recognition Receptors                 | 5.47           | 0.123  | 2.121   |
| STAT3 Pathway                                                                | 4.42           | 0.0667 | -0.816  | STAT3 Pathway                                                                | 4.68           | 0.0741 | -0.378  |
| JAK/Stat Signaling                                                           | 4.23           | 0.0854 | -0.378  | Coronavirus Pathogenesis Pathway                                             | 4.56           | 0.0597 | -3.464  |
| Role of RIG1-like Receptors in Antiviral Innate Immunity                     | 3.66           | 0.109  | 1.342   | Role of PKR in Interferon Induction and Antiviral Response                   | 3.89           | 0.0662 | 3       |
| Naïve CD8 T cells                                                            |                |        |         |                                                                              |                |        |         |
| HC                                                                           |                |        |         | HIV <sup>+</sup>                                                             |                |        |         |
| Canonical pathway                                                            | -log (p-value) | Ratio  | Z-score | Canonical pathway                                                            | -log (p-value) | Ratio  | Z-score |

|                                                                              |                       |              |                |                                                                              |                       |              |                |
|------------------------------------------------------------------------------|-----------------------|--------------|----------------|------------------------------------------------------------------------------|-----------------------|--------------|----------------|
| Interferon Signaling                                                         | 10.3                  | 0.222        | 1.89           | Interferon Signaling                                                         | 12.9                  | 0.306        | 2.53           |
| Systemic Lupus Erythematosus in B Cell Signaling Pathway                     | 7.77                  | 0.0474       | 3.606          | Role of Hypercytokinemia/hyperchemokinaemia in the Pathogenesis of Influenza | 10.9                  | 0.151        | 3.606          |
| Prolactin Signaling                                                          | 7.2                   | 0.093        | 1.134          | Systemic Lupus Erythematosus in B Cell Signaling Pathway                     | 8.7                   | 0.0657       | 4.243          |
| Role of Hypercytokinemia/hyperchemokinaemia in the Pathogenesis of Influenza | 7.2                   | 0.093        | 2.828          | Th1 Pathway                                                                  | 6.98                  | 0.0917       | 1              |
| Th1 Pathway                                                                  | 6.08                  | 0.0667       | 0.378          | Role of Pattern Recognition Receptors in Recognition of Bacteria and Viruses | 6.75                  | 0.0774       | 2.236          |
| Tumor Microenvironment Pathway                                               | 5.74                  | 0.0503       | 2.333          | Prolactin Signaling                                                          | 6.3                   | 0.105        | 1.414          |
| Coronavirus Pathogenesis Pathway                                             | 5.33                  | 0.0448       | -3             | Coronavirus Pathogenesis Pathway                                             | 5.55                  | 0.0597       | -2.714         |
| MSP-RON Signaling in Macrophages Pathway                                     | 5.14                  | 0.0614       | 1.134          | STAT3 Pathway                                                                | 5.55                  | 0.0741       | 0.378          |
| GM-CSF Signaling                                                             | 4.13                  | 0.0714       | 1              | Tumor Microenvironment Pathway                                               | 5.25                  | 0.0615       | 2.714          |
| Oncostatin M Signaling                                                       | 3.84                  | 0.093        | 2              | MSP-RON Signaling in Macrophages Pathway                                     | 4.38                  | 0.0702       | 1.414          |
| <b>Memory CD8 T cells</b>                                                    |                       |              |                |                                                                              |                       |              |                |
| <b>HC</b>                                                                    |                       |              |                | <b>HIV<sup>+</sup></b>                                                       |                       |              |                |
| Canonical pathway                                                            | <b>-log (p-value)</b> | <b>Ratio</b> | <b>Z-score</b> | Canonical pathway                                                            | <b>-log (p-value)</b> | <b>Ratio</b> | <b>Z-score</b> |
| Interferon Signaling                                                         | 16.5                  | 0.333        | 2.714          | Interferon Signaling                                                         | 14.7                  | 0.333        | 2.714          |
| Role of Hypercytokinemia/hyperchemokinaemia in the Pathogenesis of Influenza | 11.6                  | 0.14         | 3.464          | Role of Hypercytokinemia/hyperchemokinaemia in the Pathogenesis of Influenza | 12.4                  | 0.163        | 3.207          |
| JAK/Stat Signaling                                                           | 5.5                   | 0.0854       | -0.378         | Th1 Pathway                                                                  | 8.17                  | 0.1          | -0.302         |
| Coronavirus Pathogenesis Pathway                                             | 5.45                  | 0.0498       | -2.53          | Systemic Lupus Erythematosus in B Cell Signaling Pathway                     | 8.11                  | 0.062        | 2.183          |
| Th1 Pathway                                                                  | 5.4                   | 0.0667       | 0.378          | JAK/Stat Signaling                                                           | 7.73                  | 0.122        | -0.632         |
| Systemic Lupus Erythematosus in B Cell Signaling Pathway                     | 5.05                  | 0.0401       | 3.317          | IL-23 Signaling Pathway                                                      | 7.54                  | 0.174        | -1.414         |
| STAT3 Pathway                                                                | 5.02                  | 0.0593       | -1.633         | Coronavirus Pathogenesis Pathway                                             | 6.53                  | 0.0647       | -3.051         |
| Activation of IRF by Cytosolic Pattern Recognition Receptors                 | 4.98                  | 0.0923       | 1.633          | GM-CSF Signaling                                                             | 6.08                  | 0.114        | -0.378         |
| MSP-RON Signaling in Macrophages Pathway                                     | 3.61                  | 0.0526       | 0.816          | IL-9 Signaling                                                               | 5.74                  | 0.171        | -0.447         |
| Tumor Microenvironment Pathway                                               | 3.33                  | 0.0391       | 1.134          | Tumor Microenvironment Pathway                                               | 5.4                   | 0.0615       | 0.302          |

Lists of differentially expressed genes (DEGs) by IL-27 stimulation selected by criteria:  $|\log_2(\text{FC})| > 1$  compared with unstimulated condition and  $\text{FDR} < 0.05$  were used for the pathway analysis (IPA). The top 10 canonical pathways are presented for the T cell subsets from PLWH (HIV<sup>+</sup>) and healthy controls (HC). Ratio indicated the number of genes predicted by IPA to map the canonical pathway. The canonical pathways in T cell subsets were listed according to their  $p$  value (-log).

**Table S4. Top 20 most-affected categories of diseases and functions predicted by IPA in T cells subsets *in vitro* stimulated with IL-27. Related to Figure 2**

| Naïve CD4 T cells                           |          |                            |                    |        |                                         |          |                            |                    |        |
|---------------------------------------------|----------|----------------------------|--------------------|--------|-----------------------------------------|----------|----------------------------|--------------------|--------|
| HC                                          |          |                            |                    |        | HIV                                     |          |                            |                    |        |
| Diseases or Functions Annotation            | p-value  | Predicted Activation State | Activation z-score | # Mole | Diseases or Functions Annotation        | p-value  | Predicted Activation State | Activation z-score | # Mole |
| Organismal death                            | 5.48E-07 | Decreased                  | -4.68              | 66     | Organismal death                        | 5.15E-13 | Decreased                  | -7.21              | 122    |
| Morbidity or mortality                      | 1.62E-07 | Decreased                  | -4.25              | 68     | Morbidity or mortality                  | 8.37E-14 | Decreased                  | -6.95              | 125    |
| Quantity of lymphatic system cells          | 2.03E-19 | Increased                  | 4.06               | 50     | Cell viability                          | 2.81E-09 | Increased                  | 6.20               | 73     |
| Quantity of lymphocytes                     | 1.68E-18 | Increased                  | 4.01               | 47     | Cell survival                           | 5.04E-09 | Increased                  | 5.94               | 74     |
| Quantity of mononuclear leukocytes          | 1.70E-18 | Increased                  | 3.92               | 48     | Cellular homeostasis                    | 3.30E-19 | Increased                  | 5.36               | 100    |
| Cell viability                              | 1.40E-06 | Increased                  | 3.90               | 43     | Cell viability of tumor cell lines      | 5.32E-07 | Increased                  | 4.80               | 52     |
| Quantity of cells                           | 1.27E-10 | Increased                  | 3.78               | 63     | Quantity of cells                       | 5.35E-16 | Increased                  | 4.11               | 108    |
| Quantity of blood cells                     | 2.50E-19 | Increased                  | 3.62               | 58     | Hematopoiesis of mononuclear leukocytes | 1.40E-24 | Increased                  | 4.01               | 69     |
| Quantity of leukocytes                      | 2.59E-20 | Increased                  | 3.44               | 56     | Autophagy                               | 3.62E-07 | Increased                  | 3.92               | 31     |
| Cell death of immune cells                  | 3.62E-17 | Increased                  | 3.18               | 40     | Quantity of lymphatic system cells      | 1.29E-23 | Increased                  | 3.87               | 75     |
| Cellular homeostasis                        | 1.19E-15 | Increased                  | 3.18               | 64     | Leukopoiesis                            | 2.52E-25 | Increased                  | 3.83               | 76     |
| Apoptosis of T lymphocytes                  | 8.77E-07 | Increased                  | 3.02               | 15     | Cell death of immune cells              | 3.93E-19 | Increased                  | 3.75               | 57     |
| Viral life cycle                            | 1.01E-06 | Decreased                  | -2.98              | 10     | Quantity of lymphocytes                 | 6.85E-23 | Increased                  | 3.72               | 71     |
| Quantity of T lymphocytes                   | 3.84E-17 | Increased                  | 2.94               | 39     | Quantity of mononuclear leukocytes      | 8.27E-24 | Increased                  | 3.58               | 74     |
| Infection of mammalia                       | 9.89E-16 | Decreased                  | -2.81              | 28     | Migration of cells                      | 5.58E-14 | Increased                  | 3.51               | 108    |
| Replication of viral replicon               | 7.43E-08 | Decreased                  | -2.80              | 8      | Lymphopoiesis                           | 1.28E-23 | Increased                  | 3.49               | 65     |
| Differentiation of antigen presenting cells | 2.86E-09 | Increased                  | 2.76               | 16     | T cell development                      | 7.60E-21 | Increased                  | 3.46               | 54     |
| Quantity of B lymphocytes                   | 7.43E-10 | Increased                  | 2.71               | 23     | Quantity of leukocytes                  | 5.08E-27 | Increased                  | 3.44               | 88     |
| Autophagy                                   | 3.96E-07 | Increased                  | 2.71               | 22     | Infection of mammalia                   | 4.24E-16 | Decreased                  | -3.41              | 37     |
| Cell viability of blood cells               | 2.80E-10 | Increased                  | 2.70               | 19     | Cell movement                           | 3.95E-14 | Increased                  | 3.41               | 117    |
| Memory CD4 T cells                          |          |                            |                    |        |                                         |          |                            |                    |        |
| HC                                          |          |                            |                    |        | HIV                                     |          |                            |                    |        |
| Diseases or Functions Annotation            | p-value  | Predicted Activation State | Activation z-score | # Mole | Diseases or Functions Annotation        | p-value  | Predicted Activation State | Activation z-score | # Mole |
| Organismal death                            | 5.43E-10 | Decreased                  | -5.11              | 90     | Infection of mammalia                   | 9.22E-23 | Decreased                  | -4.13              | 42     |
| Morbidity or mortality                      | 1.71E-10 | Decreased                  | -4.63              | 92     | Organismal death                        | 1.71E-11 | Decreased                  | -3.92              | 105    |
| Cell viability                              | 2.80E-07 | Increased                  | 4.22               | 54     | Cell viability                          | 3.35E-07 | Increased                  | 3.72               | 60     |
| Cell survival                               | 3.45E-07 | Increased                  | 4.01               | 55     | Morbidity or mortality                  | 2.45E-12 | Decreased                  | -3.61              | 108    |
| Infection of mammalia                       | 1.28E-19 | Decreased                  | -3.92              | 36     | Cell death of immune cells              | 6.27E-21 | Increased                  | 3.50               | 55     |
| Cell death of immune cells                  | 1.85E-19 | Increased                  | 3.88               | 49     | Cell death of blood cells               | 3.35E-20 | Increased                  | 3.47               | 56     |

|                                           |          |           |       |    |                                             |          |           |       |    |
|-------------------------------------------|----------|-----------|-------|----|---------------------------------------------|----------|-----------|-------|----|
| Replication of viral replicon             | 5.92E-12 | Decreased | -3.42 | 12 | Viral life cycle                            | 2.52E-11 | Decreased | -3.41 | 17 |
| Cellular homeostasis                      | 2.55E-17 | Increased | 3.15  | 79 | Replication of viral replicon               | 3.28E-15 | Decreased | -3.40 | 15 |
| Viral life cycle                          | 2.73E-09 | Decreased | -3.13 | 14 | Cellular homeostasis                        | 2.73E-17 | Increased | 3.21  | 87 |
| Autophagy                                 | 3.24E-06 | Increased | 2.93  | 24 | Replication of vesicular stomatitis virus   | 7.36E-15 | Decreased | -3.07 | 16 |
| Multiple Sclerosis                        | 1.08E-05 | Increased | 2.63  | 15 | Differentiation of antigen presenting cells | 3.43E-08 | Increased | 3.00  | 18 |
| Replication of vesicular stomatitis virus | 6.31E-12 | Decreased | -2.60 | 13 | Multiple Sclerosis                          | 4.01E-06 | Increased | 2.99  | 17 |
| Transactivation of RNA                    | 1.35E-11 | Increased | 2.59  | 31 | Differentiation of phagocytes               | 4.20E-09 | Increased | 2.91  | 22 |
| Hematopoiesis of phagocytes               | 1.37E-09 | Increased | 2.59  | 18 | Apoptosis of T lymphocytes                  | 1.19E-07 | Increased | 2.86  | 20 |
| Apoptosis of T lymphocytes                | 2.61E-07 | Increased | 2.55  | 18 | Cell viability of myeloma cell lines        | 6.33E-06 | Increased | 2.77  | 10 |
| Replication of virus                      | 8.44E-16 | Decreased | -2.54 | 40 | Cell death of T lymphocytes                 | 7.33E-11 | Increased | 2.67  | 26 |
| Differentiation of phagocytes             | 2.45E-10 | Increased | 2.52  | 22 | Replication of Murine herpesvirus 4         | 9.99E-10 | Decreased | -2.65 | 7  |
| Cell death of fibroblast cell lines       | 8.01E-06 | Increased | 2.49  | 20 | Transactivation                             | 3.17E-11 | Increased | 2.64  | 34 |
| Dendropoiesis                             | 1.44E-08 | Increased | 2.49  | 14 | Hematopoiesis of phagocytes                 | 1.47E-08 | Increased | 2.62  | 18 |
| Maturation of leukocytes                  | 1.33E-09 | Increased | 2.48  | 17 | Transactivation of RNA                      | 3.31E-11 | Increased | 2.58  | 33 |

### Naïve CD8 T cells

| HC                                          |          |                            |                    |        | HIV                                         |          |                            |                    |        |
|---------------------------------------------|----------|----------------------------|--------------------|--------|---------------------------------------------|----------|----------------------------|--------------------|--------|
| Diseases or Functions Annotation            | p-value  | Predicted Activation State | Activation z-score | # Mole | Diseases or Functions Annotation            | p-value  | Predicted Activation State | Activation z-score | # Mole |
| Cell viability                              | 2.79E-05 | Increased                  | 4.49               | 30     | Cellular homeostasis                        | 1.04E-17 | Increased                  | 5.22               | 76     |
| Cellular homeostasis                        | 1.07E-16 | Increased                  | 4.22               | 52     | Cell viability                              | 1.34E-07 | Increased                  | 4.58               | 52     |
| Organismal death                            | 3.95E-08 | Decreased                  | -3.88              | 52     | Cell survival                               | 1.56E-07 | Increased                  | 4.54               | 53     |
| Morbidity or mortality                      | 2.03E-08 | Decreased                  | -3.56              | 53     | Hematopoiesis of mononuclear leukocytes     | 3.90E-23 | Increased                  | 4.02               | 55     |
| Leukopoiesis                                | 3.59E-19 | Increased                  | 3.44               | 40     | Infection of mammalia                       | 2.93E-15 | Decreased                  | -3.92              | 30     |
| Hematopoiesis of mononuclear leukocytes     | 5.23E-18 | Increased                  | 3.31               | 36     | Organismal death                            | 2.83E-13 | Decreased                  | -3.80              | 93     |
| Differentiation of T lymphocytes            | 8.61E-14 | Increased                  | 3.23               | 23     | Leukopoiesis                                | 2.19E-24 | Increased                  | 3.76               | 61     |
| Autophagy of cells                          | 4.70E-07 | Increased                  | 3.23               | 16     | Lymphopoiesis                               | 1.62E-21 | Increased                  | 3.60               | 51     |
| Differentiation of antigen presenting cells | 9.43E-11 | Increased                  | 3.16               | 15     | T cell development                          | 6.70E-22 | Increased                  | 3.59               | 46     |
| Autophagy                                   | 5.25E-08 | Increased                  | 3.10               | 19     | Cell death of immune cells                  | 1.45E-18 | Increased                  | 3.55               | 46     |
| Infection of mammalia                       | 4.69E-12 | Decreased                  | -3.09              | 20     | Morbidity or mortality                      | 1.97E-13 | Decreased                  | -3.53              | 94     |
| Differentiation of phagocytes               | 5.24E-13 | Increased                  | 3.05               | 19     | Homeostasis of leukocytes                   | 4.18E-21 | Increased                  | 3.36               | 47     |
| Lymphopoiesis                               | 1.51E-15 | Increased                  | 2.78               | 32     | Viral life cycle                            | 9.21E-08 | Decreased                  | -3.28              | 12     |
| Apoptosis of cervical cancer cell lines     | 1.04E-05 | Increased                  | 2.74               | 12     | Replication of viral replicon               | 5.56E-11 | Decreased                  | -3.28              | 11     |
| Development of phagocytes                   | 7.41E-13 | Increased                  | 2.73               | 18     | Cell death of blood cells                   | 4.37E-18 | Increased                  | 3.26               | 47     |
| Hematopoiesis of phagocytes                 | 3.55E-12 | Increased                  | 2.70               | 16     | Differentiation of T lymphocytes            | 4.47E-17 | Increased                  | 3.25               | 34     |
| Homeostasis of leukocytes                   | 1.60E-16 | Increased                  | 2.69               | 31     | Differentiation of antigen presenting cells | 9.83E-10 | Increased                  | 3.04               | 18     |
| Quantity of lymphatic system cells          | 1.37E-18 | Increased                  | 2.69               | 40     | Maturation of leukocytes                    | 4.17E-10 | Increased                  | 3.01               | 17     |

| Lymphocyte homeostasis                      | 7.17E-16 | Increased                  | 2.69               | 30     | Differentiation of phagocytes                | 5.70E-11 | Increased                  | 2.94               | 22     |
|---------------------------------------------|----------|----------------------------|--------------------|--------|----------------------------------------------|----------|----------------------------|--------------------|--------|
| Cell death of cervical cancer cell lines    | 5.93E-06 | Increased                  | 2.68               | 14     | Neuromuscular disease                        | 2.52E-07 | Increased                  | 2.78               | 38     |
| Memory CD8 T cells                          |          |                            |                    |        |                                              |          |                            |                    |        |
| HC                                          |          |                            |                    |        | HIV                                          |          |                            |                    |        |
| Diseases or Functions Annotation            | p-value  | Predicted Activation State | Activation z-score | # Mole | Diseases or Functions Annotation             | p-value  | Predicted Activation State | Activation z-score | # Mole |
| Organismal death                            | 1.02E-05 | Decreased                  | -4.83              | 54     | Cellular homeostasis                         | 1.12E-13 | Increased                  | 3.04               | 67     |
| Morbidity or mortality                      | 6.48E-06 | Decreased                  | -4.55              | 55     | Replication of RNA virus                     | 3.58E-17 | Decreased                  | -2.97              | 38     |
| Infection of mammalia                       | 7.42E-16 | Decreased                  | -4.12              | 26     | Infection of mammalia                        | 5.84E-14 | Decreased                  | -2.96              | 28     |
| Cell viability                              | 2.19E-05 | Increased                  | 3.96               | 35     | Cell death of blood cells                    | 5.50E-18 | Increased                  | 2.91               | 46     |
| Cellular homeostasis                        | 6.06E-12 | Increased                  | 3.08               | 51     | Cell death of immune cells                   | 1.96E-18 | Increased                  | 2.87               | 45     |
| Cell death of immune cells                  | 1.73E-13 | Increased                  | 3.08               | 32     | Viral life cycle                             | 6.23E-08 | Decreased                  | -2.80              | 12     |
| Differentiation of phagocytes               | 7.40E-08 | Increased                  | 2.84               | 15     | Replication of viral replicon                | 3.78E-11 | Decreased                  | -2.78              | 11     |
| Maturation of leukocytes                    | 4.78E-05 | Increased                  | 2.82               | 9      | Viral Infection                              | 6.74E-23 | Decreased                  | -2.77              | 89     |
| Differentiation of antigen presenting cells | 8.78E-07 | Increased                  | 2.67               | 12     | Activation-induced cell death                | 1.85E-08 | Increased                  | 2.76               | 10     |
| Cell viability of leukocytes                | 5.47E-08 | Increased                  | 2.65               | 14     | Replication of virus                         | 1.60E-17 | Decreased                  | -2.74              | 40     |
| Viral life cycle                            | 1.69E-08 | Decreased                  | -2.63              | 11     | Neuromuscular disease                        | 2.21E-06 | Increased                  | 2.63               | 35     |
| Multiple Sclerosis                          | 8.61E-06 | Increased                  | 2.63               | 12     | Autophagy of cells                           | 3.47E-06 | Increased                  | 2.62               | 20     |
| Relapsing-remitting multiple sclerosis      | 2.49E-05 | Increased                  | 2.63               | 7      | Replication of vesicular stomatitis virus    | 5.43E-10 | Decreased                  | -2.58              | 11     |
| Replication of viral replicon               | 2.84E-11 | Decreased                  | -2.61              | 10     | Autophagy                                    | 5.57E-06 | Increased                  | 2.57               | 22     |
| Hematopoiesis of phagocytes                 | 4.91E-07 | Increased                  | 2.60               | 12     | Endotoxicosis                                | 6.23E-08 | Increased                  | 2.55               | 12     |
| Leukopoiesis                                | 2.98E-17 | Increased                  | 2.51               | 42     | Cell death of macrophages                    | 2.85E-11 | Increased                  | 2.46               | 15     |
| Quantity of B lymphocytes                   | 6.92E-07 | Increased                  | 2.42               | 17     | Apoptosis of cervical cancer cell lines      | 5.71E-07 | Increased                  | 2.45               | 18     |
| Replication of cells                        | 2.68E-06 | Decreased                  | -2.42              | 7      | Activation-induced cell death of lymphocytes | 1.07E-07 | Increased                  | 2.39               | 8      |
| Autophagy                                   | 7.92E-05 | Increased                  | 2.42               | 16     | Endotoxemia                                  | 4.06E-07 | Increased                  | 2.36               | 11     |
| Hematopoiesis of mononuclear leukocytes     | 1.73E-16 | Increased                  | 2.40               | 38     | Endotoxin shock response                     | 2.01E-06 | Increased                  | 2.36               | 9      |

Lists of differentially expressed gene (DEGs) induced by IL-27 stimulation selected by  $|\log_2(\text{FC})| > 1$  and adjusted  $p$ -value  $< 0.05$  was used as input in the Diseases and Functions (IPA). Top 20 activated functions (Activation Z-score  $> 2$  or  $< -2$ ) predicted by IPA are listed. A positive Z value or negative Z value indicated that a function is predicted to be increased or decreased. \*# Mole: the number of molecules (DEGs) are involved in different functions.

Figure S1

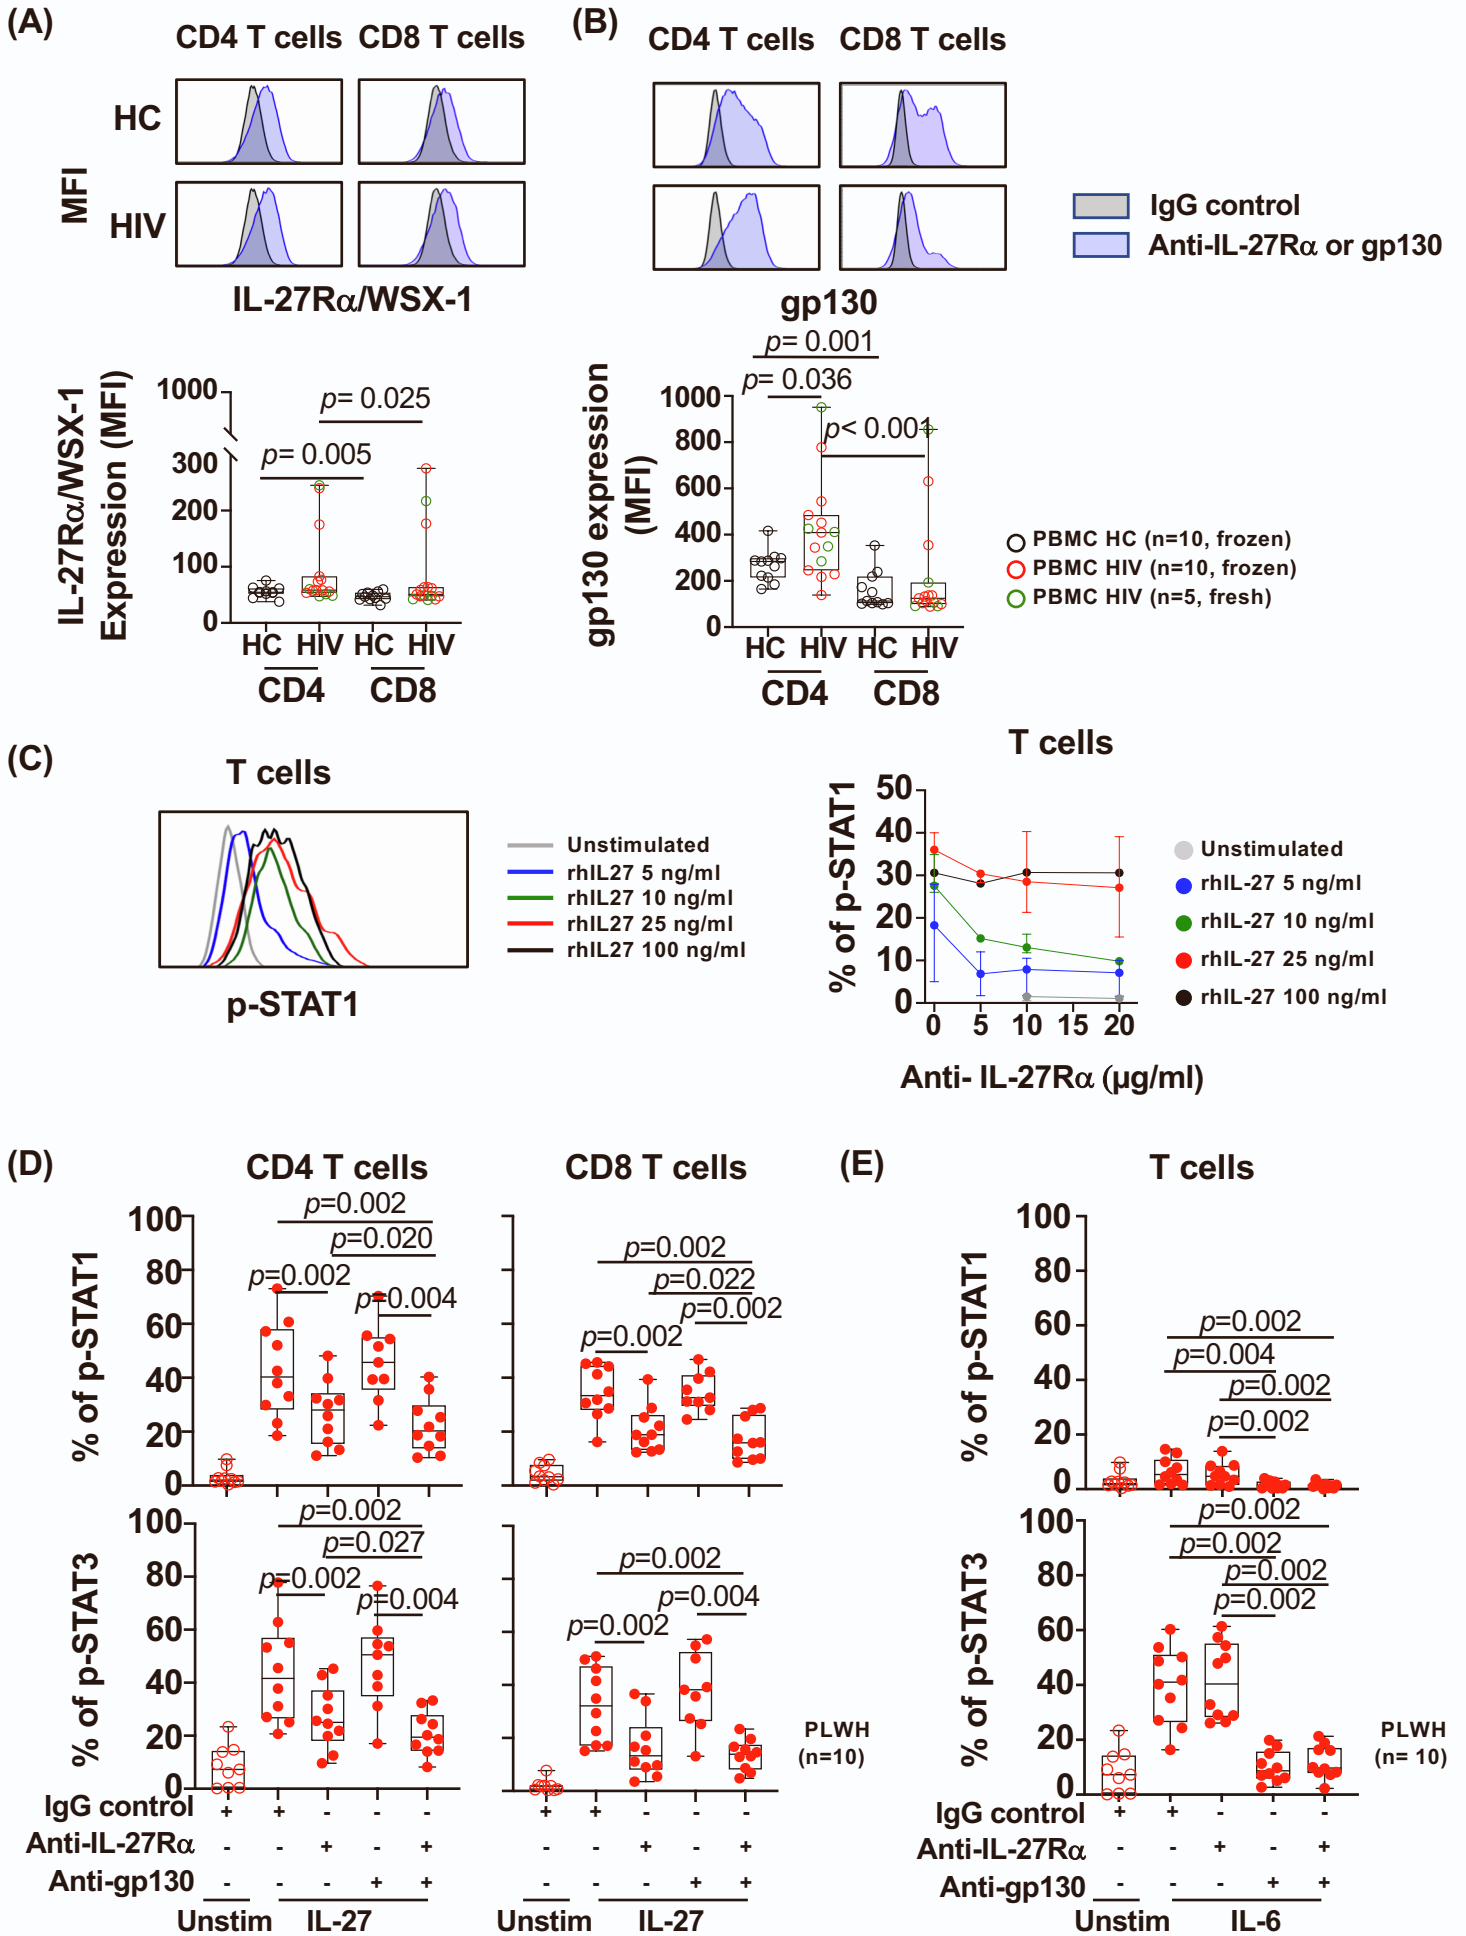

Figure S2

DEGs regulated by IL-27

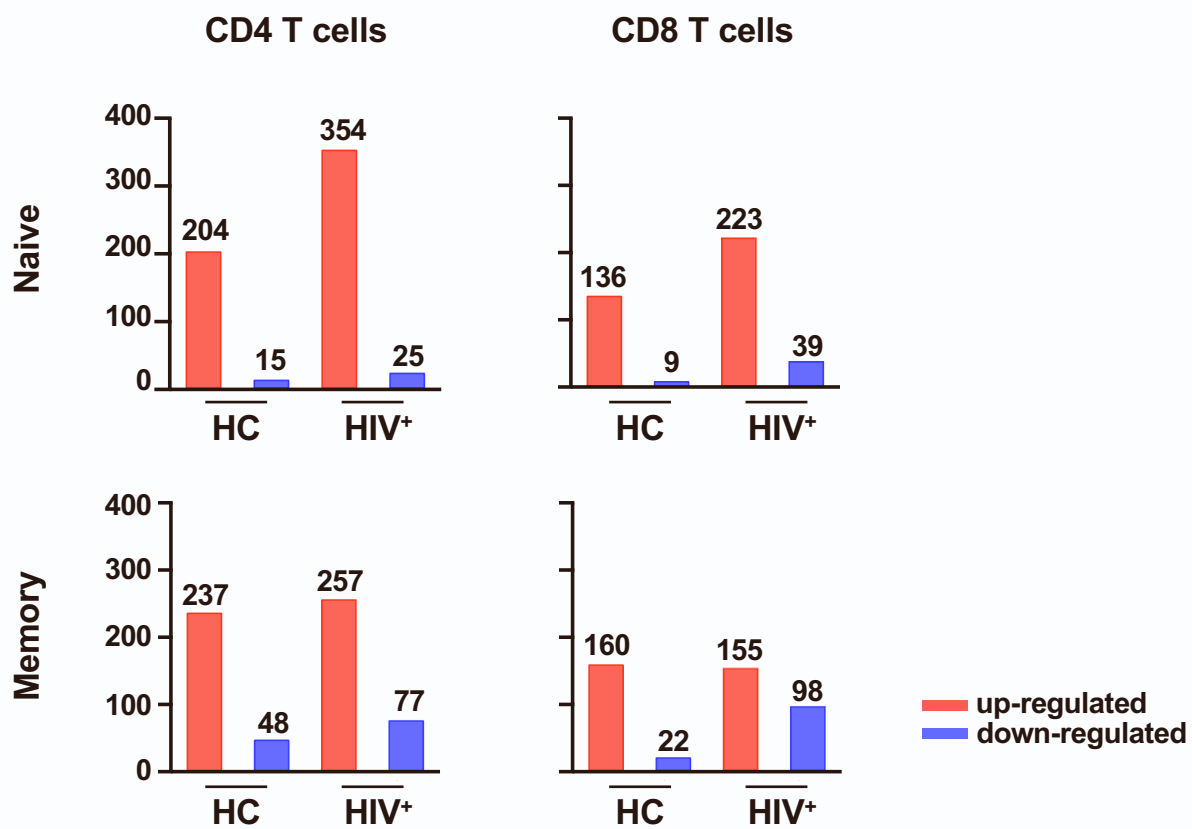

Figure S3

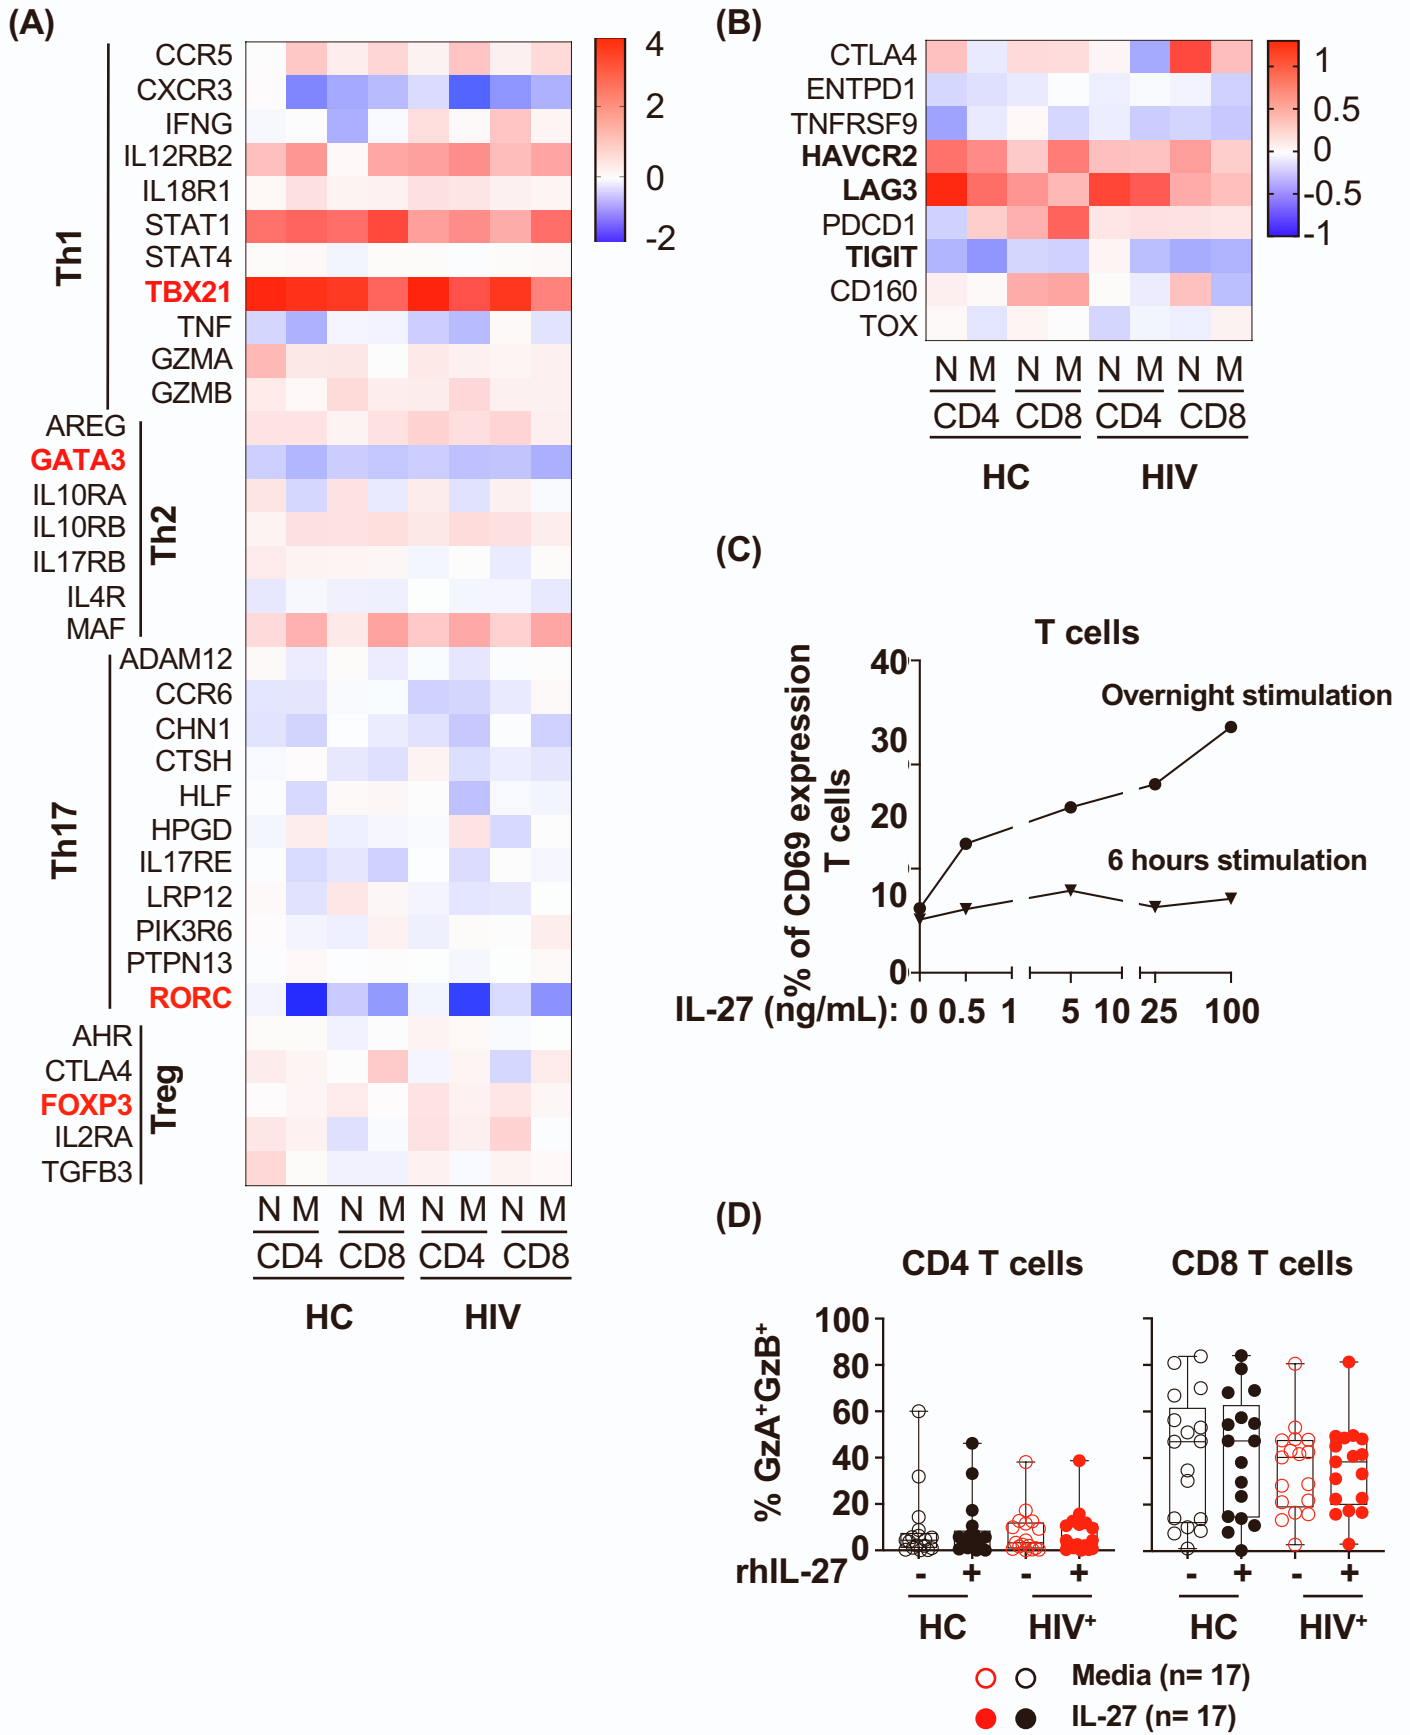



Figure S4

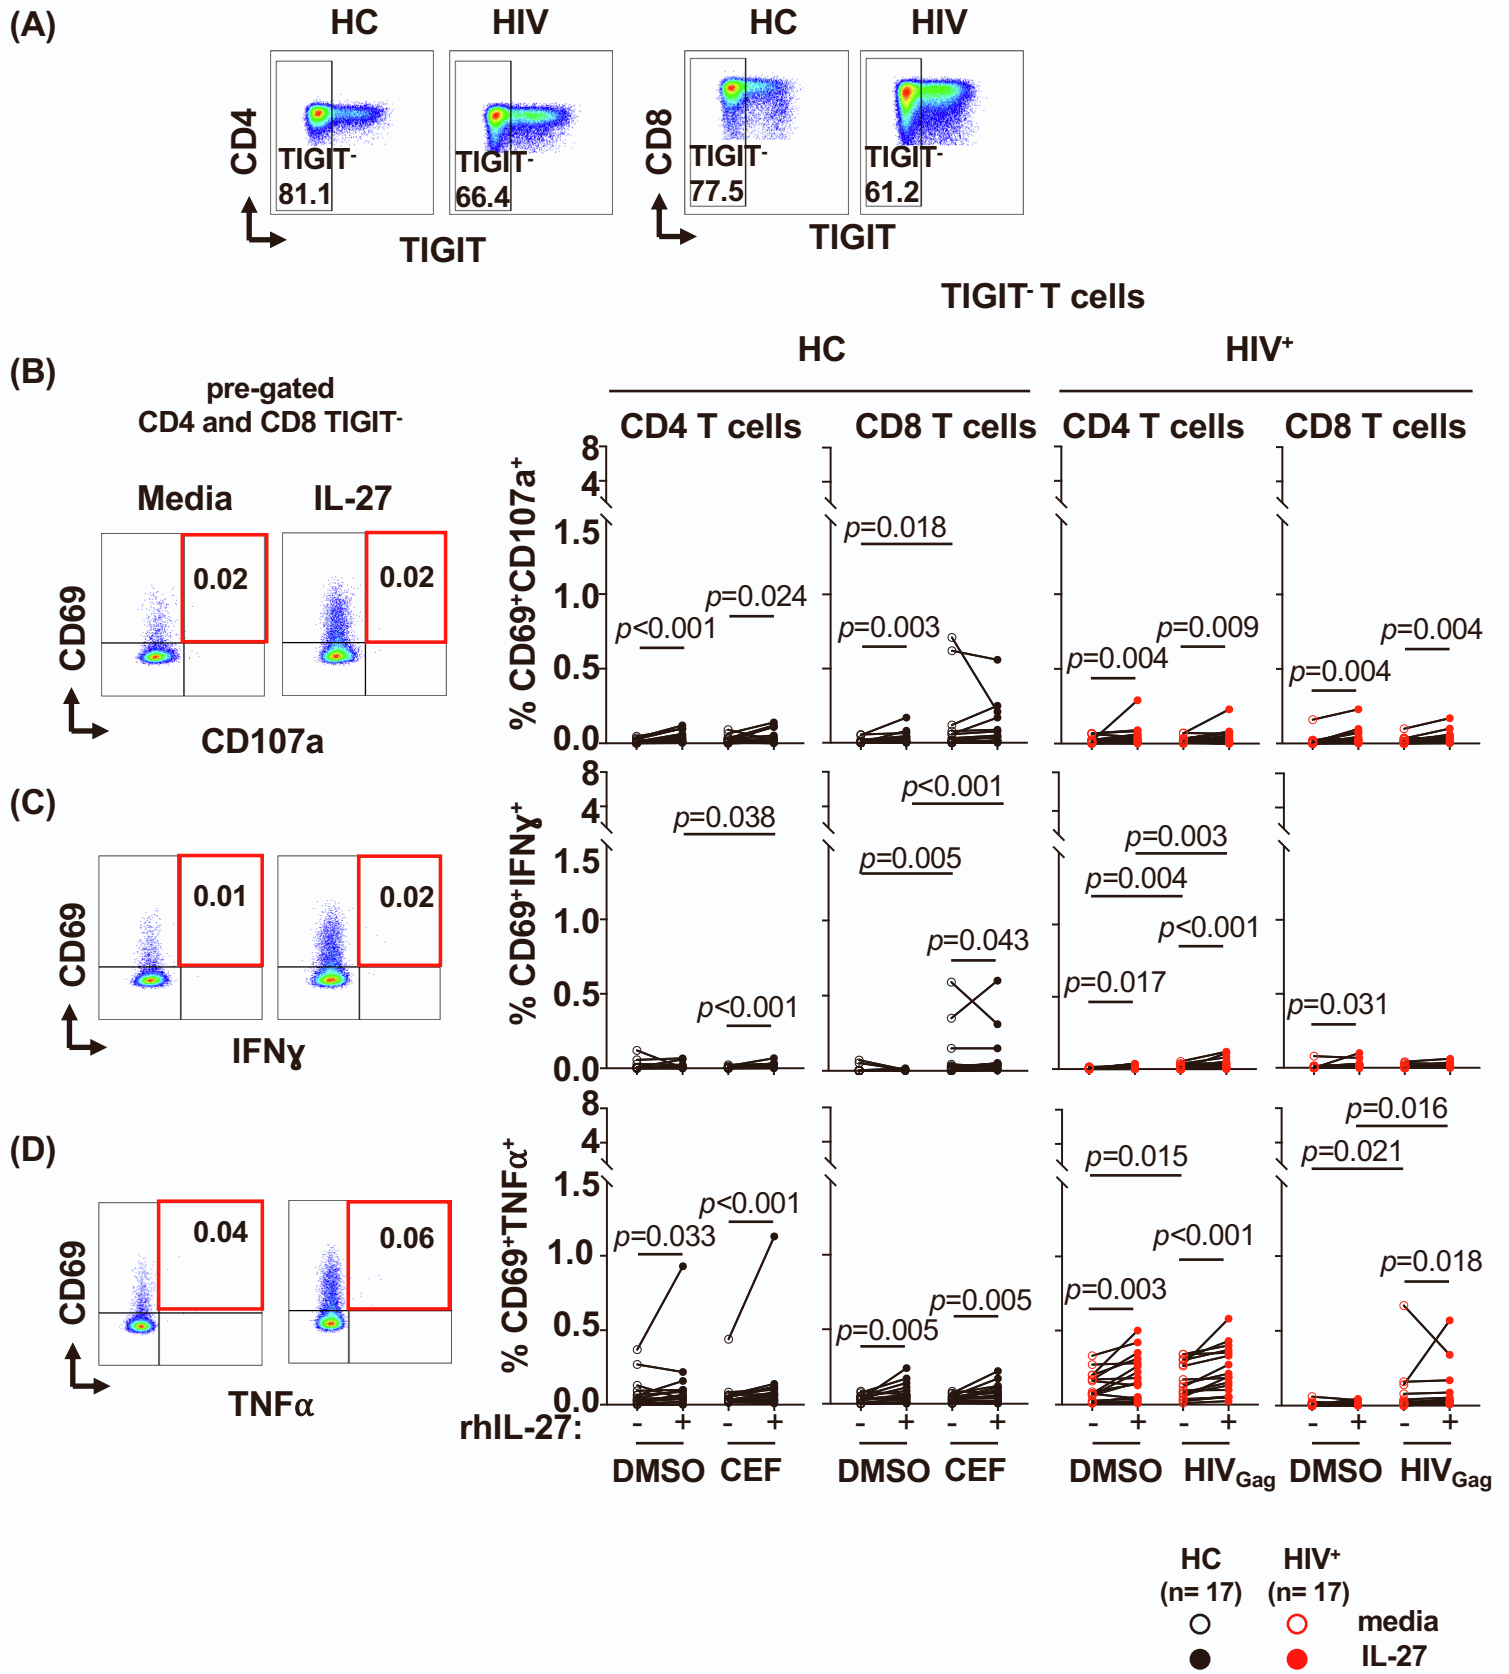

Figure S5

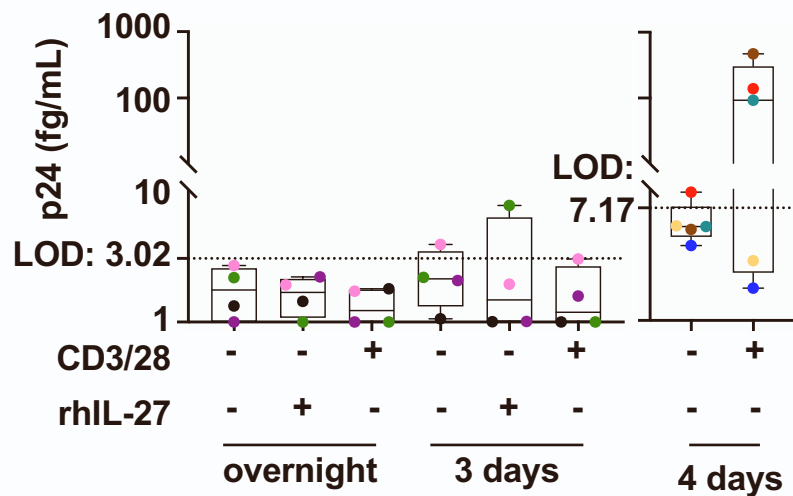

|   | Viral load (copies/mL) | CD4 (cells/ $\mu$ L) |
|---|------------------------|----------------------|
| ● | <20                    | 737                  |
| ● | <20                    | 578                  |
| ● | <20                    | 835                  |
| ● | <20                    | 425                  |
| ● | <20                    | 868                  |
| ● | <40                    | 1357                 |
| ● | <40                    | 517                  |
| ● | <20                    | 854                  |
| ● | <20                    | 785                  |
